# Supplementary material
Source: publisher figshare collection journal article supplement (https://acs.figshare.com/ndownloader/files/5340445)
Supplement: Supplementary file 1 [file 5340445]

 
data_chris08s 
 
_audit_creation_method            SHELXL-97 
_chemical_name_systematic 
; 
 ? 
; 
_chemical_name_common             ? 
_chemical_melting_point           ? 
_chemical_formula_moiety          ? 
_chemical_formula_sum 
 'C40.50 H38 Cl9.50 N2 Pd' 
_chemical_formula_weight          995.90 
 
loop_ 
 _atom_type_symbol 
 _atom_type_description 
 _atom_type_scat_dispersion_real 
 _atom_type_scat_dispersion_imag 
 _atom_type_scat_source 
 'C'  'C'   0.0033   0.0016 
 'International Tables Vol C Tables 4.2.6.8 and 6.1.1.4' 
 'H'  'H'   0.0000   0.0000 
 'International Tables Vol C Tables 4.2.6.8 and 6.1.1.4' 
 'N'  'N'   0.0061   0.0033 
 'International Tables Vol C Tables 4.2.6.8 and 6.1.1.4' 
 'Cl'  'Cl'   0.1484   0.1585 
 'International Tables Vol C Tables 4.2.6.8 and 6.1.1.4' 
 'Pd'  'Pd'  -0.9988   1.0072 
 'International Tables Vol C Tables 4.2.6.8 and 6.1.1.4' 
 
_symmetry_cell_setting            ? 
_symmetry_space_group_name_H-M    'P 21/ c' 
 
loop_ 
 _symmetry_equiv_pos_as_xyz 
 'x, y, z' 
 '-x, y+1/2, -z+1/2' 
 '-x, -y, -z' 
 'x, -y-1/2, z-1/2' 
 
_cell_length_a                    15.494(3) 
_cell_length_b                    13.882(3) 
_cell_length_c                    21.230(3) 
_cell_angle_alpha                 90.00 
_cell_angle_beta                  113.310(11) 
_cell_angle_gamma                 90.00 
_cell_volume                      4193.6(14) 
_cell_formula_units_Z             4 
_cell_measurement_temperature     100(2) 
_cell_measurement_reflns_used     ? 
_cell_measurement_theta_min       ? 
_cell_measurement_theta_max       ? 
 
_exptl_crystal_description        ? 
_exptl_crystal_colour             ? 
_exptl_crystal_size_max           0.30 
_exptl_crystal_size_mid           0.20 
_exptl_crystal_size_min           0.10 
_exptl_crystal_density_meas       ? 
_exptl_crystal_density_diffrn     1.577 
_exptl_crystal_density_method     'not measured' 
_exptl_crystal_F_000              2010 
_exptl_absorpt_coefficient_mu     1.081 
_exptl_absorpt_correction_type    'multi-scan' 
_exptl_absorpt_correction_T_min   0.7375 
_exptl_absorpt_correction_T_max   0.8996 
_exptl_absorpt_process_details    
;
Intensities corrected based on redundancy using program SADABS 
(G. Sheldrick, Bruker Analytical Systems, Madison, WI)
; 
_exptl_special_details 
; 
 ? 
; 
 
_diffrn_ambient_temperature       100(2) 
_diffrn_radiation_wavelength      0.71073 
_diffrn_radiation_type            MoK\a 
_diffrn_radiation_source          'fine-focus sealed tube' 
_diffrn_radiation_monochromator   graphite 
_diffrn_measurement_device_type   ? 
_diffrn_measurement_method        ? 
_diffrn_detector_area_resol_mean  ? 
_diffrn_standards_number          ? 
_diffrn_standards_interval_count  ? 
_diffrn_standards_interval_time   ? 
_diffrn_standards_decay_%         ? 
_diffrn_reflns_number             39551 
_diffrn_reflns_av_R_equivalents   0.0281 
_diffrn_reflns_av_sigmaI/netI     0.0235 
_diffrn_reflns_limit_h_min        -18 
_diffrn_reflns_limit_h_max        18 
_diffrn_reflns_limit_k_min        -16 
_diffrn_reflns_limit_k_max        16 
_diffrn_reflns_limit_l_min        -25 
_diffrn_reflns_limit_l_max        25 
_diffrn_reflns_theta_min          1.80 
_diffrn_reflns_theta_max          25.03 
_reflns_number_total              7409 
_reflns_number_gt                 6961 
_reflns_threshold_expression      >2sigma(I) 
 
_computing_data_collection        ? 
_computing_cell_refinement        ? 
_computing_data_reduction         ? 
_computing_structure_solution     'SHELXS-97 (Sheldrick, 1990)' 
_computing_structure_refinement   'SHELXL-97 (Sheldrick, 1997)' 
_computing_molecular_graphics     ? 
_computing_publication_material   ? 
 
_refine_special_details 
; 
 Refinement of F^2^ against ALL reflections.  The weighted R-factor wR and 
 goodness of fit S are based on F^2^, conventional R-factors R are based 
 on F, with F set to zero for negative F^2^. The threshold expression of 
 F^2^ > 2sigma(F^2^) is used only for calculating R-factors(gt) etc. and is 
 not relevant to the choice of reflections for refinement.  R-factors based 
 on F^2^ are statistically about twice as large as those based on F, and R- 
 factors based on ALL data will be even larger. 
; 
 
_refine_ls_structure_factor_coef  Fsqd  
_refine_ls_matrix_type            full 
_refine_ls_weighting_scheme       calc  
_refine_ls_weighting_details 
 'calc w=1/[\s^2^(Fo^2^)+(0.0714P)^2^+19.6437P] where P=(Fo^2^+2Fc^2^)/3' 
_atom_sites_solution_primary      direct 
_atom_sites_solution_secondary    difmap 
_atom_sites_solution_hydrogens    geom 
_refine_ls_hydrogen_treatment     mixed 
_refine_ls_extinction_method      none 
_refine_ls_extinction_coef        ? 
_refine_ls_number_reflns          7409 
_refine_ls_number_parameters      532 
_refine_ls_number_restraints      0 
_refine_ls_R_factor_all           0.0631 
_refine_ls_R_factor_gt            0.0596 
_refine_ls_wR_factor_ref          0.1548 
_refine_ls_wR_factor_gt           0.1524 
_refine_ls_goodness_of_fit_ref    1.156 
_refine_ls_restrained_S_all       1.156 
_refine_ls_shift/su_max           0.001 
_refine_ls_shift/su_mean          0.000 
 
loop_ 
 _atom_site_label 
 _atom_site_type_symbol 
 _atom_site_fract_x 
 _atom_site_fract_y 
 _atom_site_fract_z 
 _atom_site_U_iso_or_equiv 
 _atom_site_adp_type 
 _atom_site_occupancy 
 _atom_site_symmetry_multiplicity 
 _atom_site_calc_flag 
 _atom_site_refinement_flags 
 _atom_site_disorder_assembly 
 _atom_site_disorder_group 
C1 C 1.1142(4) 0.7659(3) 0.8019(2) 0.0190(10) Uani 1 1 d . . . 
C2 C 1.2056(4) 0.7506(4) 0.8056(3) 0.0233(11) Uani 1 1 d . . . 
H2 H 1.2157 0.7361 0.7653 0.015(13) Uiso 1 1 d R . . 
C3 C 1.2805(4) 0.7568(4) 0.8679(3) 0.0289(12) Uani 1 1 d . . . 
H3 H 1.3425 0.7466 0.8705 0.032(16) Uiso 1 1 d R . . 
C4 C 1.2661(4) 0.7783(4) 0.9281(3) 0.0290(12) Uani 1 1 d . . . 
H4 H 1.3184 0.7813 0.9709 0.018(13) Uiso 1 1 d R . . 
C5 C 1.1786(4) 0.7945(4) 0.9252(3) 0.0237(11) Uani 1 1 d . . . 
H5 H 1.1700 0.8093 0.9660 0.012(12) Uiso 1 1 d R . . 
C6 C 1.0995(4) 0.7897(3) 0.8617(3) 0.0201(10) Uani 1 1 d . . . 
C7 C 1.0072(4) 0.8068(3) 0.8557(3) 0.0212(10) Uani 1 1 d . . . 
H7 H 0.9964 0.8205 0.8958 0.014(12) Uiso 1 1 d R . . 
C8 C 0.9328(4) 0.8044(3) 0.7940(3) 0.0210(10) Uani 1 1 d . . . 
C9 C 0.9522(3) 0.7848(3) 0.7348(3) 0.0187(10) Uani 1 1 d . . . 
C10 C 0.8347(4) 0.8212(4) 0.7893(3) 0.0265(12) Uani 1 1 d . . . 
H10A H 0.8109 0.8823 0.7656 0.039(17) Uiso 1 1 d R . . 
H10B H 0.7939 0.7684 0.7638 0.05(2) Uiso 1 1 d R . . 
H10C H 0.8353 0.8240 0.8356 0.048(19) Uiso 1 1 d R . . 
C11 C 1.0374(4) 0.9361(4) 0.6024(2) 0.0215(10) Uani 1 1 d . . . 
C12 C 1.1265(4) 0.9238(4) 0.6015(3) 0.0277(12) Uani 1 1 d . . . 
H12 H 1.1569 0.8629 0.6123 0.022(14) Uiso 1 1 d R . . 
C13 C 1.1697(4) 0.9997(5) 0.5850(3) 0.0364(14) Uani 1 1 d . . . 
H13 H 1.2311 0.9915 0.5859 0.032(16) Uiso 1 1 d R . . 
C14 C 1.1248(5) 1.0904(4) 0.5667(3) 0.0392(16) Uani 1 1 d . . . 
H14 H 1.1556 1.1423 0.5549 0.044(18) Uiso 1 1 d R . . 
C15 C 1.0387(5) 1.1026(4) 0.5660(3) 0.0336(14) Uani 1 1 d . . . 
H15 H 1.0082 1.1631 0.5525 0.046(19) Uiso 1 1 d R . . 
C16 C 0.9919(4) 1.0271(4) 0.5849(3) 0.0263(12) Uani 1 1 d . . . 
C17 C 0.9064(4) 1.0394(4) 0.5908(3) 0.0274(12) Uani 1 1 d . . . 
H17 H 0.8744 1.0992 0.5775 0.023(14) Uiso 1 1 d R . . 
C18 C 0.8668(4) 0.9682(4) 0.6151(3) 0.0225(11) Uani 1 1 d . . . 
C19 C 0.9129(3) 0.8768(3) 0.6295(2) 0.0193(10) Uani 1 1 d . . . 
C20 C 0.7822(4) 0.9910(4) 0.6306(3) 0.0292(12) Uani 1 1 d . . . 
H20A H 0.7556 1.0529 0.6096 0.031(16) Uiso 1 1 d R . . 
H20B H 0.7350 0.9402 0.6118 0.11(4) Uiso 1 1 d R . . 
H20C H 0.8011 0.9949 0.6803 0.05(2) Uiso 1 1 d R . . 
C21 C 0.8769(3) 0.7973(3) 0.6622(2) 0.0174(10) Uani 1 1 d . . . 
H21 H 0.8204 0.8242 0.6678 0.000(10) Uiso 1 1 d R . . 
C22 C 0.8448(3) 0.6985(3) 0.6232(2) 0.0190(10) Uani 1 1 d . . . 
H22 H 0.9025 0.6589 0.6326 0.028(15) Uiso 1 1 d R . . 
C23 C 0.7845(3) 0.6461(3) 0.6549(2) 0.0194(10) Uani 1 1 d . . . 
C24 C 0.6940(4) 0.6792(4) 0.6407(3) 0.0235(11) Uani 1 1 d . . . 
H24 H 0.6707 0.7324 0.6105 0.034(17) Uiso 1 1 d R . . 
C25 C 0.6368(4) 0.6371(4) 0.6692(3) 0.0280(12) Uani 1 1 d . . . 
H25 H 0.5756 0.6619 0.6589 0.041(18) Uiso 1 1 d R . . 
C26 C 0.6686(4) 0.5589(4) 0.7125(3) 0.0280(12) Uani 1 1 d . . . 
C27 C 0.7583(4) 0.5258(4) 0.7270(3) 0.0277(12) Uani 1 1 d . . . 
H27 H 0.7804 0.4719 0.7567 0.033(16) Uiso 1 1 d R . . 
C28 C 0.8179(4) 0.5675(4) 0.7000(2) 0.0208(10) Uani 1 1 d . . . 
C29 C 0.6056(4) 0.5099(5) 0.7427(4) 0.0432(16) Uani 1 1 d . . . 
H29A H 0.5768 0.4526 0.7156 0.10(3) Uiso 1 1 d R . . 
H29B H 0.6433 0.4909 0.7902 0.09(3) Uiso 1 1 d R . . 
H29C H 0.5563 0.5547 0.7419 0.10(4) Uiso 1 1 d R . . 
C30 C 0.9162(4) 0.5282(4) 0.7216(3) 0.0236(11) Uani 1 1 d . . . 
H30A H 0.9234 0.4713 0.7505 0.031(16) Uiso 1 1 d R . . 
H30B H 0.9273 0.5103 0.6808 0.034(16) Uiso 1 1 d R . . 
H30C H 0.9617 0.5776 0.7474 0.040(18) Uiso 1 1 d R . . 
C31 C 0.7936(3) 0.7073(3) 0.5456(3) 0.0198(10) Uani 1 1 d . . . 
C32 C 0.8004(4) 0.6318(4) 0.5035(3) 0.0235(11) Uani 1 1 d . . . 
C33 C 0.7468(4) 0.6381(4) 0.4328(3) 0.0252(11) Uani 1 1 d . . . 
H33 H 0.7540 0.5891 0.4040 0.030(16) Uiso 1 1 d R . . 
C34 C 0.6838(4) 0.7119(4) 0.4027(3) 0.0265(11) Uani 1 1 d . . . 
C35 C 0.6778(4) 0.7857(4) 0.4449(3) 0.0263(11) Uani 1 1 d . . . 
H35 H 0.6366 0.8384 0.4259 0.016(13) Uiso 1 1 d R . . 
C36 C 0.7320(4) 0.7827(4) 0.5150(3) 0.0226(11) Uani 1 1 d . . . 
H36 H 0.7269 0.8339 0.5430 0.021(14) Uiso 1 1 d R . . 
C37 C 0.8611(4) 0.5445(4) 0.5312(3) 0.0285(12) Uani 1 1 d . . . 
H37A H 0.8610 0.5047 0.4931 0.06(2) Uiso 1 1 d R . . 
H37B H 0.9255 0.5649 0.5593 0.028(15) Uiso 1 1 d R . . 
H37C H 0.8363 0.5069 0.5595 0.041(18) Uiso 1 1 d R . . 
C38 C 0.6243(4) 0.7135(5) 0.3264(3) 0.0385(14) Uani 1 1 d . . . 
H38A H 0.6210 0.6485 0.3076 0.05(2) Uiso 1 1 d R . . 
H38B H 0.5608 0.7358 0.3184 0.06(2) Uiso 1 1 d R . . 
H38C H 0.6525 0.7573 0.3037 0.07(3) Uiso 1 1 d R . . 
C39 C 0.3148(4) 0.6492(5) 0.6680(3) 0.0377(14) Uani 1 1 d . . . 
H39 H 0.2452 0.6407 0.6510 0.045 Uiso 1 1 calc R . . 
C40 C 0.5396(6) 0.3624(6) 0.9260(4) 0.062(2) Uani 1 1 d . . . 
H40 H 0.5698 0.3044 0.9155 0.074 Uiso 1 1 calc R . . 
C41 C 0.5088(12) 0.982(2) 0.0205(10) 0.098(8) Uani 0.50 1 d P . . 
Cl1 Cl 1.11510(8) 0.58043(8) 0.68816(6) 0.0225(3) Uani 1 1 d . . . 
Cl2 Cl 1.06626(9) 0.69911(9) 0.54883(6) 0.0253(3) Uani 1 1 d . . . 
Cl3 Cl 0.36864(12) 0.58105(17) 0.74343(10) 0.0594(5) Uani 1 1 d . . . 
Cl4 Cl 0.34142(13) 0.77201(13) 0.68684(11) 0.0538(5) Uani 1 1 d . . . 
Cl5 Cl 0.35136(11) 0.60994(12) 0.60414(8) 0.0419(4) Uani 1 1 d . . . 
Cl6 Cl 0.49590(16) 0.3272(3) 0.98659(12) 0.0942(10) Uani 1 1 d . . . 
Cl7 Cl 0.6263(2) 0.4479(2) 0.95969(15) 0.1097(11) Uani 1 1 d . . . 
Cl8 Cl 0.45212(17) 0.3977(2) 0.85065(12) 0.0824(7) Uani 1 1 d . . . 
Cl9 Cl 0.5069(4) 0.8915(5) -0.0517(4) 0.132(3) Uani 0.50 1 d P . . 
Cl10 Cl 0.5970(3) 0.9805(3) 0.0026(3) 0.0649(12) Uani 0.50 1 d P . . 
Cl11 Cl 0.6031(3) 1.0406(3) 0.0391(2) 0.0584(10) Uani 0.50 1 d P . . 
N1 N 1.0380(3) 0.7631(3) 0.7397(2) 0.0178(8) Uani 1 1 d . . . 
N2 N 0.9929(3) 0.8622(3) 0.6214(2) 0.0192(9) Uani 1 1 d . . . 
Pd1 Pd 1.05415(2) 0.73117(3) 0.650960(18) 0.01636(13) Uani 1 1 d . . . 
 
loop_ 
 _atom_site_aniso_label 
 _atom_site_aniso_U_11 
 _atom_site_aniso_U_22 
 _atom_site_aniso_U_33 
 _atom_site_aniso_U_23 
 _atom_site_aniso_U_13 
 _atom_site_aniso_U_12 
C1 0.030(3) 0.008(2) 0.019(2) 0.0019(18) 0.009(2) -0.0025(19) 
C2 0.030(3) 0.016(2) 0.026(3) -0.002(2) 0.013(2) -0.002(2) 
C3 0.027(3) 0.023(3) 0.034(3) -0.004(2) 0.010(2) 0.000(2) 
C4 0.032(3) 0.024(3) 0.024(3) -0.002(2) 0.003(2) 0.000(2) 
C5 0.036(3) 0.014(2) 0.019(2) -0.0031(19) 0.009(2) -0.006(2) 
C6 0.034(3) 0.006(2) 0.023(3) -0.0002(18) 0.014(2) -0.0040(19) 
C7 0.036(3) 0.011(2) 0.022(3) -0.0005(19) 0.016(2) -0.001(2) 
C8 0.033(3) 0.011(2) 0.025(3) -0.0004(19) 0.016(2) -0.003(2) 
C9 0.027(3) 0.006(2) 0.024(3) -0.0013(18) 0.012(2) -0.0042(18) 
C10 0.030(3) 0.027(3) 0.028(3) -0.004(2) 0.017(2) -0.003(2) 
C11 0.031(3) 0.019(3) 0.015(2) -0.0034(19) 0.010(2) -0.008(2) 
C12 0.032(3) 0.027(3) 0.023(3) 0.001(2) 0.010(2) -0.009(2) 
C13 0.039(3) 0.048(4) 0.024(3) -0.005(3) 0.014(3) -0.021(3) 
C14 0.066(4) 0.028(3) 0.026(3) -0.005(2) 0.021(3) -0.026(3) 
C15 0.062(4) 0.016(3) 0.022(3) -0.001(2) 0.017(3) -0.012(3) 
C16 0.047(3) 0.014(2) 0.016(2) -0.0032(19) 0.010(2) -0.010(2) 
C17 0.046(3) 0.012(2) 0.018(2) -0.0011(19) 0.007(2) 0.002(2) 
C18 0.028(3) 0.015(2) 0.020(2) -0.0037(19) 0.005(2) 0.000(2) 
C19 0.028(3) 0.014(2) 0.016(2) -0.0007(18) 0.007(2) -0.003(2) 
C20 0.038(3) 0.021(3) 0.028(3) -0.003(2) 0.012(2) 0.007(2) 
C21 0.020(2) 0.012(2) 0.023(2) -0.0001(19) 0.012(2) 0.0019(18) 
C22 0.024(2) 0.010(2) 0.023(3) -0.0025(19) 0.008(2) -0.0022(19) 
C23 0.023(2) 0.017(2) 0.018(2) -0.0044(19) 0.007(2) -0.0046(19) 
C24 0.026(3) 0.019(3) 0.025(3) 0.000(2) 0.010(2) 0.000(2) 
C25 0.026(3) 0.027(3) 0.030(3) -0.001(2) 0.011(2) -0.003(2) 
C26 0.030(3) 0.028(3) 0.030(3) -0.001(2) 0.015(2) -0.008(2) 
C27 0.032(3) 0.026(3) 0.024(3) 0.003(2) 0.011(2) -0.007(2) 
C28 0.026(3) 0.016(2) 0.021(2) -0.0032(19) 0.010(2) -0.006(2) 
C29 0.033(3) 0.051(4) 0.051(4) 0.018(3) 0.022(3) -0.004(3) 
C30 0.032(3) 0.015(2) 0.025(3) 0.005(2) 0.013(2) 0.002(2) 
C31 0.023(2) 0.016(2) 0.021(2) -0.0013(19) 0.010(2) -0.0013(19) 
C32 0.024(3) 0.020(3) 0.031(3) 0.000(2) 0.015(2) -0.007(2) 
C33 0.034(3) 0.022(3) 0.025(3) -0.008(2) 0.018(2) -0.011(2) 
C34 0.026(3) 0.033(3) 0.023(3) -0.002(2) 0.013(2) -0.008(2) 
C35 0.026(3) 0.024(3) 0.029(3) 0.005(2) 0.011(2) 0.000(2) 
C36 0.025(3) 0.019(3) 0.024(3) 0.000(2) 0.011(2) -0.002(2) 
C37 0.041(3) 0.018(3) 0.030(3) -0.004(2) 0.018(3) 0.000(2) 
C38 0.036(3) 0.050(4) 0.027(3) -0.003(3) 0.010(3) -0.003(3) 
C39 0.033(3) 0.040(4) 0.044(4) 0.005(3) 0.020(3) -0.001(3) 
C40 0.072(5) 0.056(5) 0.061(5) -0.004(4) 0.030(4) -0.007(4) 
C41 0.039(9) 0.17(2) 0.082(15) 0.077(14) 0.018(10) -0.004(11) 
Cl1 0.0265(6) 0.0148(6) 0.0276(6) 0.0011(5) 0.0120(5) 0.0040(5) 
Cl2 0.0324(7) 0.0261(6) 0.0221(6) -0.0008(5) 0.0157(5) 0.0033(5) 
Cl3 0.0413(9) 0.0865(14) 0.0528(10) 0.0297(10) 0.0210(8) 0.0165(9) 
Cl4 0.0468(10) 0.0464(10) 0.0711(12) -0.0097(9) 0.0265(9) -0.0037(8) 
Cl5 0.0367(8) 0.0467(9) 0.0463(9) -0.0020(7) 0.0206(7) -0.0009(7) 
Cl6 0.0506(12) 0.165(3) 0.0643(14) 0.0353(16) 0.0201(10) -0.0137(15) 
Cl7 0.112(2) 0.118(2) 0.0816(17) -0.0004(16) 0.0206(16) -0.073(2) 
Cl8 0.0765(15) 0.0985(19) 0.0587(13) 0.0238(12) 0.0125(11) -0.0020(13) 
Cl9 0.061(3) 0.131(5) 0.212(7) -0.132(5) 0.063(4) -0.037(3) 
Cl10 0.064(2) 0.055(2) 0.099(3) 0.025(2) 0.057(2) 0.022(2) 
Cl11 0.065(2) 0.043(2) 0.053(2) 0.0009(17) 0.0082(18) -0.0252(18) 
N1 0.022(2) 0.0111(19) 0.022(2) 0.0001(16) 0.0108(17) -0.0019(16) 
N2 0.027(2) 0.014(2) 0.016(2) -0.0006(16) 0.0092(17) -0.0039(17) 
Pd1 0.0210(2) 0.0129(2) 0.0176(2) 0.00034(13) 0.01011(15) 0.00081(14) 
 
_geom_special_details 
; 
 All esds (except the esd in the dihedral angle between two l.s. planes) 
 are estimated using the full covariance matrix.  The cell esds are taken 
 into account individually in the estimation of esds in distances, angles 
 and torsion angles; correlations between esds in cell parameters are only 
 used when they are defined by crystal symmetry.  An approximate (isotropic) 
 treatment of cell esds is used for estimating esds involving l.s. planes. 
; 
 
loop_ 
 _geom_bond_atom_site_label_1 
 _geom_bond_atom_site_label_2 
 _geom_bond_distance 
 _geom_bond_site_symmetry_2 
 _geom_bond_publ_flag 
C1 N1 1.380(6) . ? 
C1 C2 1.403(7) . ? 
C1 C6 1.415(7) . ? 
C2 C3 1.374(8) . ? 
C3 C4 1.413(8) . ? 
C4 C5 1.351(8) . ? 
C5 C6 1.420(7) . ? 
C6 C7 1.406(7) . ? 
C7 C8 1.361(7) . ? 
C8 C9 1.428(7) . ? 
C8 C10 1.502(7) . ? 
C9 N1 1.326(6) . ? 
C9 C21 1.531(7) . ? 
C11 N2 1.381(6) . ? 
C11 C12 1.400(8) . ? 
C11 C16 1.422(8) . ? 
C12 C13 1.366(8) . ? 
C13 C14 1.417(10) . ? 
C14 C15 1.339(9) . ? 
C15 C16 1.422(8) . ? 
C16 C17 1.390(8) . ? 
C17 C18 1.367(8) . ? 
C18 C19 1.428(7) . ? 
C18 C20 1.505(8) . ? 
C19 N2 1.333(7) . ? 
C19 C21 1.523(7) . ? 
C21 C22 1.578(6) . ? 
C22 C31 1.524(7) . ? 
C22 C23 1.534(7) . ? 
C23 C24 1.391(7) . ? 
C23 C28 1.407(7) . ? 
C24 C25 1.384(7) . ? 
C25 C26 1.381(8) . ? 
C26 C27 1.378(8) . ? 
C26 C29 1.524(8) . ? 
C27 C28 1.391(7) . ? 
C28 C30 1.508(7) . ? 
C31 C36 1.392(7) . ? 
C31 C32 1.408(7) . ? 
C32 C33 1.400(7) . ? 
C32 C37 1.505(7) . ? 
C33 C34 1.385(8) . ? 
C34 C35 1.388(8) . ? 
C34 C38 1.515(8) . ? 
C35 C36 1.390(7) . ? 
C39 Cl5 1.750(6) . ? 
C39 Cl3 1.761(6) . ? 
C39 Cl4 1.762(7) . ? 
C40 Cl8 1.709(9) . ? 
C40 Cl7 1.721(8) . ? 
C40 Cl6 1.744(9) . ? 
C41 C41 0.94(3) 3_675 ? 
C41 Cl10 1.555(19) . ? 
C41 Cl11 1.58(2) . ? 
C41 Cl10 1.60(2) 3_675 ? 
C41 Cl11 1.723(19) 3_675 ? 
C41 Cl9 1.92(3) 3_675 ? 
C41 Cl9 1.97(3) . ? 
Cl1 Pd1 2.3030(13) . ? 
Cl2 Pd1 2.2927(13) . ? 
Cl9 Cl10 1.880(7) . ? 
Cl9 C41 1.92(3) 3_675 ? 
Cl9 Cl11 2.056(7) 3_675 ? 
Cl10 Cl11 1.116(6) . ? 
Cl10 C41 1.60(2) 3_675 ? 
Cl11 C41 1.723(19) 3_675 ? 
Cl11 Cl9 2.056(7) 3_675 ? 
N1 Pd1 2.045(4) . ? 
N2 Pd1 2.033(4) . ? 
 
loop_ 
 _geom_angle_atom_site_label_1 
 _geom_angle_atom_site_label_2 
 _geom_angle_atom_site_label_3 
 _geom_angle 
 _geom_angle_site_symmetry_1 
 _geom_angle_site_symmetry_3 
 _geom_angle_publ_flag 
N1 C1 C2 120.9(4) . . ? 
N1 C1 C6 118.9(5) . . ? 
C2 C1 C6 120.2(5) . . ? 
C3 C2 C1 119.6(5) . . ? 
C2 C3 C4 120.5(5) . . ? 
C5 C4 C3 120.6(5) . . ? 
C4 C5 C6 120.6(5) . . ? 
C7 C6 C1 118.6(5) . . ? 
C7 C6 C5 122.9(5) . . ? 
C1 C6 C5 118.5(5) . . ? 
C8 C7 C6 121.8(5) . . ? 
C7 C8 C9 117.3(5) . . ? 
C7 C8 C10 120.6(4) . . ? 
C9 C8 C10 122.1(5) . . ? 
N1 C9 C8 121.8(5) . . ? 
N1 C9 C21 116.5(4) . . ? 
C8 C9 C21 121.4(4) . . ? 
N2 C11 C12 121.5(5) . . ? 
N2 C11 C16 118.9(5) . . ? 
C12 C11 C16 119.6(5) . . ? 
C13 C12 C11 119.8(6) . . ? 
C12 C13 C14 121.3(6) . . ? 
C15 C14 C13 119.6(5) . . ? 
C14 C15 C16 121.4(6) . . ? 
C17 C16 C15 123.1(5) . . ? 
C17 C16 C11 118.5(5) . . ? 
C15 C16 C11 118.3(5) . . ? 
C18 C17 C16 122.0(5) . . ? 
C17 C18 C19 117.5(5) . . ? 
C17 C18 C20 119.2(5) . . ? 
C19 C18 C20 123.0(5) . . ? 
N2 C19 C18 121.3(4) . . ? 
N2 C19 C21 118.4(4) . . ? 
C18 C19 C21 119.9(4) . . ? 
C19 C21 C9 105.7(4) . . ? 
C19 C21 C22 119.1(4) . . ? 
C9 C21 C22 112.7(4) . . ? 
C31 C22 C23 111.4(4) . . ? 
C31 C22 C21 114.8(4) . . ? 
C23 C22 C21 107.6(4) . . ? 
C24 C23 C28 118.1(5) . . ? 
C24 C23 C22 119.0(4) . . ? 
C28 C23 C22 122.9(4) . . ? 
C25 C24 C23 122.0(5) . . ? 
C26 C25 C24 120.1(5) . . ? 
C27 C26 C25 118.2(5) . . ? 
C27 C26 C29 120.9(5) . . ? 
C25 C26 C29 120.8(5) . . ? 
C26 C27 C28 122.9(5) . . ? 
C27 C28 C23 118.6(5) . . ? 
C27 C28 C30 118.6(5) . . ? 
C23 C28 C30 122.8(4) . . ? 
C36 C31 C32 118.2(5) . . ? 
C36 C31 C22 122.1(4) . . ? 
C32 C31 C22 119.3(4) . . ? 
C33 C32 C31 118.2(5) . . ? 
C33 C32 C37 118.9(5) . . ? 
C31 C32 C37 122.9(5) . . ? 
C34 C33 C32 123.4(5) . . ? 
C33 C34 C35 117.6(5) . . ? 
C33 C34 C38 121.6(5) . . ? 
C35 C34 C38 120.8(5) . . ? 
C34 C35 C36 120.2(5) . . ? 
C35 C36 C31 122.3(5) . . ? 
Cl5 C39 Cl3 110.8(4) . . ? 
Cl5 C39 Cl4 111.1(3) . . ? 
Cl3 C39 Cl4 109.2(4) . . ? 
Cl8 C40 Cl7 113.0(5) . . ? 
Cl8 C40 Cl6 112.0(5) . . ? 
Cl7 C40 Cl6 110.7(5) . . ? 
C41 C41 Cl10 75(2) 3_675 . ? 
C41 C41 Cl11 82(2) 3_675 . ? 
C41 C41 Cl10 70(2) 3_675 3_675 ? 
Cl10 C41 Cl10 145.3(11) . 3_675 ? 
Cl11 C41 Cl10 130.2(18) . 3_675 ? 
C41 C41 Cl11 65(2) 3_675 3_675 ? 
Cl11 C41 Cl11 147.2(10) . 3_675 ? 
C41 C41 Cl9 79(4) 3_675 3_675 ? 
Cl10 C41 Cl9 109.9(13) . 3_675 ? 
Cl11 C41 Cl9 71.1(12) . 3_675 ? 
Cl10 C41 Cl9 63.7(10) 3_675 3_675 ? 
Cl11 C41 Cl9 101.1(11) 3_675 3_675 ? 
C41 C41 Cl9 73(4) 3_675 . ? 
Cl10 C41 Cl9 63.1(10) . . ? 
Cl11 C41 Cl9 104.5(12) . . ? 
Cl10 C41 Cl9 105.6(12) 3_675 . ? 
Cl11 C41 Cl9 67.1(10) 3_675 . ? 
Cl9 C41 Cl9 152.1(9) 3_675 . ? 
Cl10 Cl9 C41 49.7(5) . 3_675 ? 
Cl10 Cl9 C41 47.5(5) . . ? 
Cl10 Cl9 Cl11 94.0(2) . 3_675 ? 
C41 Cl9 Cl11 46.5(5) 3_675 3_675 ? 
C41 Cl9 Cl11 50.6(5) . 3_675 ? 
Cl11 Cl10 C41 70.2(11) . . ? 
Cl11 Cl10 C41 76.5(11) . 3_675 ? 
Cl11 Cl10 Cl9 139.0(4) . . ? 
C41 Cl10 Cl9 69.4(11) . . ? 
C41 Cl10 Cl9 66.6(11) 3_675 . ? 
Cl10 Cl11 C41 68.1(11) . . ? 
Cl10 Cl11 C41 64.5(10) . 3_675 ? 
Cl10 Cl11 Cl9 125.9(4) . 3_675 ? 
C41 Cl11 Cl9 62.4(11) . 3_675 ? 
C41 Cl11 Cl9 62.3(10) 3_675 3_675 ? 
C9 N1 C1 121.4(4) . . ? 
C9 N1 Pd1 117.5(3) . . ? 
C1 N1 Pd1 121.1(3) . . ? 
C19 N2 C11 121.4(4) . . ? 
C19 N2 Pd1 116.2(3) . . ? 
C11 N2 Pd1 121.9(3) . . ? 
N2 Pd1 N1 82.99(16) . . ? 
N2 Pd1 Cl2 94.85(12) . . ? 
N1 Pd1 Cl2 177.44(12) . . ? 
N2 Pd1 Cl1 175.51(12) . . ? 
N1 Pd1 Cl1 93.69(11) . . ? 
Cl2 Pd1 Cl1 88.39(5) . . ? 
 
loop_ 
 _geom_torsion_atom_site_label_1 
 _geom_torsion_atom_site_label_2 
 _geom_torsion_atom_site_label_3 
 _geom_torsion_atom_site_label_4 
 _geom_torsion 
 _geom_torsion_site_symmetry_1 
 _geom_torsion_site_symmetry_2 
 _geom_torsion_site_symmetry_3 
 _geom_torsion_site_symmetry_4 
 _geom_torsion_publ_flag 
N1 C1 C2 C3 177.9(5) . . . . ? 
C6 C1 C2 C3 1.5(7) . . . . ? 
C1 C2 C3 C4 0.0(8) . . . . ? 
C2 C3 C4 C5 -1.0(8) . . . . ? 
C3 C4 C5 C6 0.4(8) . . . . ? 
N1 C1 C6 C7 1.9(7) . . . . ? 
C2 C1 C6 C7 178.4(4) . . . . ? 
N1 C1 C6 C5 -178.6(4) . . . . ? 
C2 C1 C6 C5 -2.0(7) . . . . ? 
C4 C5 C6 C7 -179.4(5) . . . . ? 
C4 C5 C6 C1 1.1(7) . . . . ? 
C1 C6 C7 C8 -2.3(7) . . . . ? 
C5 C6 C7 C8 178.1(5) . . . . ? 
C6 C7 C8 C9 -0.8(7) . . . . ? 
C6 C7 C8 C10 178.9(5) . . . . ? 
C7 C8 C9 N1 4.6(7) . . . . ? 
C10 C8 C9 N1 -175.0(4) . . . . ? 
C7 C8 C9 C21 -169.4(4) . . . . ? 
C10 C8 C9 C21 11.0(7) . . . . ? 
N2 C11 C12 C13 -177.5(5) . . . . ? 
C16 C11 C12 C13 1.2(8) . . . . ? 
C11 C12 C13 C14 -2.0(8) . . . . ? 
C12 C13 C14 C15 0.6(9) . . . . ? 
C13 C14 C15 C16 1.6(8) . . . . ? 
C14 C15 C16 C17 174.0(5) . . . . ? 
C14 C15 C16 C11 -2.3(8) . . . . ? 
N2 C11 C16 C17 3.1(7) . . . . ? 
C12 C11 C16 C17 -175.6(5) . . . . ? 
N2 C11 C16 C15 179.6(4) . . . . ? 
C12 C11 C16 C15 0.9(7) . . . . ? 
C15 C16 C17 C18 -173.9(5) . . . . ? 
C11 C16 C17 C18 2.4(7) . . . . ? 
C16 C17 C18 C19 -4.8(7) . . . . ? 
C16 C17 C18 C20 170.5(5) . . . . ? 
C17 C18 C19 N2 1.8(7) . . . . ? 
C20 C18 C19 N2 -173.3(5) . . . . ? 
C17 C18 C19 C21 174.9(4) . . . . ? 
C20 C18 C19 C21 -0.3(7) . . . . ? 
N2 C19 C21 C9 62.3(5) . . . . ? 
C18 C19 C21 C9 -111.0(5) . . . . ? 
N2 C19 C21 C22 -65.7(6) . . . . ? 
C18 C19 C21 C22 121.0(5) . . . . ? 
N1 C9 C21 C19 -57.9(5) . . . . ? 
C8 C9 C21 C19 116.4(5) . . . . ? 
N1 C9 C21 C22 73.8(5) . . . . ? 
C8 C9 C21 C22 -111.9(5) . . . . ? 
C19 C21 C22 C31 -37.8(6) . . . . ? 
C9 C21 C22 C31 -162.5(4) . . . . ? 
C19 C21 C22 C23 -162.4(4) . . . . ? 
C9 C21 C22 C23 72.9(5) . . . . ? 
C31 C22 C23 C24 -53.3(6) . . . . ? 
C21 C22 C23 C24 73.4(5) . . . . ? 
C31 C22 C23 C28 129.0(5) . . . . ? 
C21 C22 C23 C28 -104.3(5) . . . . ? 
C28 C23 C24 C25 -0.3(7) . . . . ? 
C22 C23 C24 C25 -178.1(5) . . . . ? 
C23 C24 C25 C26 -0.8(8) . . . . ? 
C24 C25 C26 C27 0.9(8) . . . . ? 
C24 C25 C26 C29 -178.3(5) . . . . ? 
C25 C26 C27 C28 0.1(8) . . . . ? 
C29 C26 C27 C28 179.3(5) . . . . ? 
C26 C27 C28 C23 -1.2(8) . . . . ? 
C26 C27 C28 C30 177.4(5) . . . . ? 
C24 C23 C28 C27 1.3(7) . . . . ? 
C22 C23 C28 C27 179.0(5) . . . . ? 
C24 C23 C28 C30 -177.3(5) . . . . ? 
C22 C23 C28 C30 0.4(7) . . . . ? 
C23 C22 C31 C36 86.0(6) . . . . ? 
C21 C22 C31 C36 -36.6(7) . . . . ? 
C23 C22 C31 C32 -87.1(5) . . . . ? 
C21 C22 C31 C32 150.3(4) . . . . ? 
C36 C31 C32 C33 1.7(7) . . . . ? 
C22 C31 C32 C33 175.0(4) . . . . ? 
C36 C31 C32 C37 -177.1(5) . . . . ? 
C22 C31 C32 C37 -3.8(7) . . . . ? 
C31 C32 C33 C34 -3.5(7) . . . . ? 
C37 C32 C33 C34 175.3(5) . . . . ? 
C32 C33 C34 C35 3.5(8) . . . . ? 
C32 C33 C34 C38 -177.4(5) . . . . ? 
C33 C34 C35 C36 -1.6(8) . . . . ? 
C38 C34 C35 C36 179.2(5) . . . . ? 
C34 C35 C36 C31 0.0(8) . . . . ? 
C32 C31 C36 C35 0.0(7) . . . . ? 
C22 C31 C36 C35 -173.2(5) . . . . ? 
C41 C41 Cl9 Cl10 82(2) 3_675 . . . ? 
Cl11 C41 Cl9 Cl10 4.8(5) . . . . ? 
Cl10 C41 Cl9 Cl10 144.7(12) 3_675 . . . ? 
Cl11 C41 Cl9 Cl10 151.2(9) 3_675 . . . ? 
Cl9 C41 Cl9 Cl10 82(2) 3_675 . . . ? 
Cl10 C41 Cl9 C41 -82(2) . . . 3_675 ? 
Cl11 C41 Cl9 C41 -77(2) . . . 3_675 ? 
Cl10 C41 Cl9 C41 62.9(18) 3_675 . . 3_675 ? 
Cl11 C41 Cl9 C41 69.5(19) 3_675 . . 3_675 ? 
Cl9 C41 Cl9 C41 0.000(5) 3_675 . . 3_675 ? 
C41 C41 Cl9 Cl11 -69.5(19) 3_675 . . 3_675 ? 
Cl10 C41 Cl9 Cl11 -151.2(9) . . . 3_675 ? 
Cl11 C41 Cl9 Cl11 -146.5(12) . . . 3_675 ? 
Cl10 C41 Cl9 Cl11 -6.6(5) 3_675 . . 3_675 ? 
Cl9 C41 Cl9 Cl11 -69.5(19) 3_675 . . 3_675 ? 
C41 C41 Cl10 Cl11 95(4) 3_675 . . . ? 
Cl10 C41 Cl10 Cl11 95(4) 3_675 . . . ? 
Cl11 C41 Cl10 Cl11 141.1(18) 3_675 . . . ? 
Cl9 C41 Cl10 Cl11 22.5(7) 3_675 . . . ? 
Cl9 C41 Cl10 Cl11 173.0(7) . . . . ? 
Cl11 C41 Cl10 C41 -95(4) . . . 3_675 ? 
Cl10 C41 Cl10 C41 0.000(10) 3_675 . . 3_675 ? 
Cl11 C41 Cl10 C41 46(2) 3_675 . . 3_675 ? 
Cl9 C41 Cl10 C41 -72(3) 3_675 . . 3_675 ? 
Cl9 C41 Cl10 C41 78(3) . . . 3_675 ? 
C41 C41 Cl10 Cl9 -78(3) 3_675 . . . ? 
Cl11 C41 Cl10 Cl9 -173.0(7) . . . . ? 
Cl10 C41 Cl10 Cl9 -78(3) 3_675 . . . ? 
Cl11 C41 Cl10 Cl9 -31.9(14) 3_675 . . . ? 
Cl9 C41 Cl10 Cl9 -150.5(9) 3_675 . . . ? 
C41 Cl9 Cl10 Cl11 27.4(9) 3_675 . . . ? 
C41 Cl9 Cl10 Cl11 -10.0(10) . . . . ? 
Cl11 Cl9 Cl10 Cl11 11.9(9) 3_675 . . . ? 
C41 Cl9 Cl10 C41 37.4(12) 3_675 . . . ? 
Cl11 Cl9 Cl10 C41 21.9(7) 3_675 . . . ? 
C41 Cl9 Cl10 C41 -37.4(12) . . . 3_675 ? 
Cl11 Cl9 Cl10 C41 -15.5(7) 3_675 . . 3_675 ? 
C41 Cl10 Cl11 C41 35.7(12) 3_675 . . . ? 
Cl9 Cl10 Cl11 C41 10.0(9) . . . . ? 
C41 Cl10 Cl11 C41 -35.7(12) . . . 3_675 ? 
Cl9 Cl10 Cl11 C41 -25.7(9) . . . 3_675 ? 
C41 Cl10 Cl11 Cl9 -24.6(8) . . . 3_675 ? 
C41 Cl10 Cl11 Cl9 11.0(8) 3_675 . . 3_675 ? 
Cl9 Cl10 Cl11 Cl9 -14.7(11) . . . 3_675 ? 
C41 C41 Cl11 Cl10 -77(3) 3_675 . . . ? 
Cl10 C41 Cl11 Cl10 -132.1(17) 3_675 . . . ? 
Cl11 C41 Cl11 Cl10 -77(3) 3_675 . . . ? 
Cl9 C41 Cl11 Cl10 -157.6(7) 3_675 . . . ? 
Cl9 C41 Cl11 Cl10 -6.4(6) . . . . ? 
Cl10 C41 Cl11 C41 77(3) . . . 3_675 ? 
Cl10 C41 Cl11 C41 -55(2) 3_675 . . 3_675 ? 
Cl11 C41 Cl11 C41 0.000(9) 3_675 . . 3_675 ? 
Cl9 C41 Cl11 C41 -81(3) 3_675 . . 3_675 ? 
Cl9 C41 Cl11 C41 70(3) . . . 3_675 ? 
C41 C41 Cl11 Cl9 81(3) 3_675 . . 3_675 ? 
Cl10 C41 Cl11 Cl9 157.6(7) . . . 3_675 ? 
Cl10 C41 Cl11 Cl9 25.5(15) 3_675 . . 3_675 ? 
Cl11 C41 Cl11 Cl9 81(3) 3_675 . . 3_675 ? 
Cl9 C41 Cl11 Cl9 151.2(9) . . . 3_675 ? 
C8 C9 N1 C1 -5.2(7) . . . . ? 
C21 C9 N1 C1 169.1(4) . . . . ? 
C8 C9 N1 Pd1 177.4(3) . . . . ? 
C21 C9 N1 Pd1 -8.3(5) . . . . ? 
C2 C1 N1 C9 -174.7(4) . . . . ? 
C6 C1 N1 C9 1.8(6) . . . . ? 
C2 C1 N1 Pd1 2.6(6) . . . . ? 
C6 C1 N1 Pd1 179.1(3) . . . . ? 
C18 C19 N2 C11 3.7(7) . . . . ? 
C21 C19 N2 C11 -169.5(4) . . . . ? 
C18 C19 N2 Pd1 175.5(3) . . . . ? 
C21 C19 N2 Pd1 2.4(5) . . . . ? 
C12 C11 N2 C19 172.6(5) . . . . ? 
C16 C11 N2 C19 -6.1(7) . . . . ? 
C12 C11 N2 Pd1 1.2(6) . . . . ? 
C16 C11 N2 Pd1 -177.5(3) . . . . ? 
C19 N2 Pd1 N1 -51.3(3) . . . . ? 
C11 N2 Pd1 N1 120.6(4) . . . . ? 
C19 N2 Pd1 Cl2 127.4(3) . . . . ? 
C11 N2 Pd1 Cl2 -60.8(4) . . . . ? 
C9 N1 Pd1 N2 55.3(3) . . . . ? 
C1 N1 Pd1 N2 -122.1(4) . . . . ? 
C9 N1 Pd1 Cl1 -121.7(3) . . . . ? 
C1 N1 Pd1 Cl1 60.9(3) . . . . ? 
 
_diffrn_measured_fraction_theta_max    0.999 
_diffrn_reflns_theta_full              25.03 
_diffrn_measured_fraction_theta_full   0.999 
_refine_diff_density_max    1.683 
_refine_diff_density_min   -1.637 
_refine_diff_density_rms    0.139 
